# Supplementary material for: Multi-scale computational investigation of Ag-doped two-dimensional Zn-based MOFs for storage and release of small NO and CO bioactive molecules
Source: Royal Society of Chemistry journal article supplement (doi:10.1039/d2cp04725j), 2022-12-15
Supplement: d2cp04725j1.pdf [file d2cp04725j1.pdf]

## **Supporting information:**

### **Multi-scale computational investigation of Ag-doped two-dimensional Zn-based MOF for storage and release of small NO and CO bioactive molecules**

Shabnam Naderlou<sup>a,\*</sup> Morteza Vahedpour<sup>a</sup>, Douglas M. Franz<sup>b</sup>

<sup>a</sup> *Department of Chemistry, University of Zanjan (ZNU), P.O. Box 38791-45371, Zanjan, Iran*

<sup>b</sup> *Department of Chemistry, University of South Florida, 4202 East Fowler Avenue, CHE205, Tampa, FL 33620-5250, USA*

\* Corresponding author.

*E-mail address:* [sh.naderlou@znu.ac.ir](mailto:sh.naderlou@znu.ac.ir) and [sh.naderloo68@gmail.com](mailto:sh.naderloo68@gmail.com).

**Table S1** Structural properties of MOFs

| Term           | symmetry | a       | b       | c       | $\alpha$ | $\beta$ | $\gamma$ | Pore diameter | AV (cm <sup>3</sup> .g <sup>-1</sup> ) | NAV (cm <sup>3</sup> .g <sup>-1</sup> ) | ASA (m <sup>2</sup> .g <sup>-1</sup> ) | NASA (m <sup>2</sup> .g <sup>-1</sup> ) |
|----------------|----------|---------|---------|---------|----------|---------|----------|---------------|----------------------------------------|-----------------------------------------|----------------------------------------|-----------------------------------------|
| (Zn)MOF-470    | P -3 1 c | 16.7057 | 16.7057 | 14.3418 | 90       | 90      | 120      | 14.89123      | 3.223                                  | 0                                       | 13825.3                                | 0                                       |
| Ag-(Zn)MOF-470 | P -3 1 c | 16.7057 | 16.7057 | 14.3418 | 90       | 90      | 120      | 13.45286      | 2.569                                  | 0                                       | 13308.8                                | 0                                       |

**Table S2** Morse potential non-bonded parameters for interactions of H<sub>2</sub>, NO, CO, Ag and H<sub>2</sub>O with MOF atoms (see the Figure S1 for the definition rules of atom types).

| Term                   | D/k <sub>B</sub> (K) | $\alpha$ (Å <sup>-1</sup> ) | r (Å) | Term                   | D/k <sub>B</sub> (K) | $\alpha$ (Å <sup>-1</sup> ) | r (Å) |
|------------------------|----------------------|-----------------------------|-------|------------------------|----------------------|-----------------------------|-------|
| N_no-C1                | 92.15                | 1.12                        | 4.07  | C_co-C1                | 178.91               | 1.47                        | 3.8   |
| N_no-C2                | 78.49                | 2.09                        | 3.2   | C_co-C2                | 78.33                | 1.88                        | 3.78  |
| N_no-C3                | 86.07                | 1.28                        | 3.79  | C_co-C3                | 54.53                | 1.46                        | 4.12  |
| N_no-C4                | 102.12               | 1.32                        | 3.69  | C_co-C4                | 168.36               | 1.41                        | 3.81  |
| N_no-C5                | 96.01                | 1.28                        | 3.8   | C_co-C5                | 73.94                | 1.55                        | 3.95  |
| N_no-C8                | 53.43                | 2.87                        | 3.13  | C_co-C8                | 95.65                | 1.76                        | 3.72  |
| N_no-C9                | 81.45                | 1.43                        | 3.62  | C_co-C9                | 185.13               | 1.69                        | 3.5   |
| N_no-H3                | 15.51                | 2.31                        | 3.14  | C_co-H3                | 23.59                | 1.52                        | 3.68  |
| N_no-H4                | 60.61                | 1.43                        | 3.39  | C_co-H4                | 28.35                | 2.07                        | 3.21  |
| N_no-H9                | 45.95                | 1.58                        | 3.45  | C_co-H9                | 23.81                | 1.11                        | 4     |
| N_no-O2                | 120.58               | 1.63                        | 3.28  | C_co-O2                | 107.08               | 1.2                         | 4.01  |
| N_no-O3                | 58.68                | 1.09                        | 4.36  | C_co-O3                | 35.14                | 1.52                        | 4.02  |
| N_no-Zn2               | 80.77                | 2.05                        | 2.85  | C_co-Zn2               | 31.16                | 1.59                        | 4.1   |
| O_no-C1                | 63.4                 | 1.51                        | 4.12  | O_co-C1                | 181                  | 1.57                        | 3.71  |
| O_no-C2                | 41.38                | 2.17                        | 3.8   | O_co-C2                | 147.85               | 1.38                        | 3.98  |
| O_no-C3                | 64.47                | 1.7                         | 4     | O_co-C3                | 112.43               | 1.68                        | 3.81  |
| O_no-C4                | 60.51                | 1.6                         | 4.14  | O_co-C4                | 53.64                | 1.62                        | 4.13  |
| O_no-C5                | 64.03                | 1.55                        | 4.2   | O_co-C5                | 76.16                | 1.78                        | 3.84  |
| O_no-C8                | 183.43               | 1.28                        | 4.08  | O_co-C8                | 61.41                | 1.65                        | 4.04  |
| O_no-C9                | 146.46               | 1.62                        | 3.8   | O_co-C9                | 50.94                | 1.59                        | 4.23  |
| O_no-H3                | 47.9                 | 1.23                        | 3.79  | O_co-H3                | 27.88                | 1.5                         | 3.76  |
| O_no-H4                | 10.08                | 1.34                        | 4.15  | O_co-H4                | 21.81                | 2.04                        | 3.34  |
| O_no-H9                | 18.79                | 1.27                        | 4.13  | O_co-H9                | 6.66                 | 1.2                         | 4.48  |
| O_no-O2                | 230.37               | 1.77                        | 3.35  | O_co-O2                | 37.18                | 1.76                        | 3.89  |
| O_no-O3                | 68.18                | 2.19                        | 3.46  | O_co-O3                | 73.1                 | 1.55                        | 3.95  |
| O_no-Zn2               | 6.95                 | 1.34                        | 4.28  | O_co-Zn2               | 132.83               | 1.55                        | 3.71  |
| N_no-N_no <sup>b</sup> | 120.18               | 1.1                         | 3.97  | C_co-C_co <sup>b</sup> | 69.04                | 1.37                        | 3.89  |
| N_no-O_no <sup>b</sup> | 104.46               | 1.36                        | 3.91  | C_co-O_co <sup>b</sup> | 59.92                | 1.61                        | 3.84  |
| O_no-O_no <sup>b</sup> | 113.99               | 1.36                        | 3.71  | O_co-O_co <sup>b</sup> | 48.61                | 2                           | 3.38  |
| H_h2-C1                | 24.84                | 1.87                        | 3.75  | Ag-N_no                | 567.94               | 2.48                        | 2.67  |
| H_h2-C2                | 29.98                | 1.7                         | 3.74  | Ag-O_no                | 694.17               | 1.45                        | 3.47  |
| H_h2-C3                | 31.73                | 1.6                         | 3.7   | Ag-C_co                | 456.87               | 2.799                       | 2.69  |
| H_h2-C4                | 30.19                | 1.76                        | 3.63  | Ag-O_co                | 529.26               | 1.48                        | 3.46  |
| H_h2-C5                | 24.84                | 1.75                        | 3.75  | Ag-C1                  | 31.54                | 1.34                        | 4.37  |

|                        |        |      |      |                     |        |      |      |
|------------------------|--------|------|------|---------------------|--------|------|------|
| H_h2-C8                | 57.65  | 2.13 | 3.5  | Ag-C2               | 64.77  | 1.51 | 3.85 |
| H_h2-C9                | 35.86  | 2.21 | 3.6  | Ag-C3               | 86.09  | 1.74 | 3.42 |
| H_h2-H3                | 8.7    | 2.03 | 3.54 | Ag-C4               | 50.64  | 1.73 | 3.6  |
| H_h2-H4                | 8.7    | 1.91 | 3.54 | Ag-C5               | 104.94 | 1.38 | 3.87 |
| H_h2-H9                | 8.2    | 1.94 | 3.63 | Ag-C8               | 115.69 | 1.49 | 3.69 |
| H_h2-O2                | 29.52  | 2.07 | 3.83 | Ag-C9               | 59.81  | 1.92 | 3.41 |
| H_h2-O3                | 74.64  | 1.87 | 3.53 | Ag-H3               | 41.37  | 2.1  | 2.96 |
| H_h2-Zn2               | 16.22  | 1.84 | 3.82 | Ag-H4               | 31.54  | 1.34 | 4.37 |
| H_h2-H_h2 <sup>a</sup> | 11.85  | 1.5  | 3.55 | Ag-H9               | 53.37  | 1.55 | 3.42 |
| H_w-C1                 | 12.4   | 1.86 | 3.54 | Ag-O2               | 86.62  | 1.49 | 3.63 |
| H_w-C2                 | 19.94  | 1.65 | 3.42 | Ag-O3               | 74.19  | 1.97 | 3.28 |
| H_w-C3                 | 28.56  | 1.55 | 3.33 | Ag-Zn2              | 77.11  | 2.37 | 3.48 |
| H_w-C4                 | 27.49  | 1.65 | 3.48 | Ag-Ag               | 72.67  | 2.33 | 3.31 |
| H_w-C5                 | 35.04  | 1.85 | 3.22 | Ag-H_w <sup>b</sup> | 47.69  | 2.06 | 2.85 |
| H_w-C8                 | 12.73  | 2.5  | 2.99 | Ag-O_w <sup>b</sup> | 42.67  | 2.38 | 3.06 |
| H_w-C9                 | 19.73  | 2.37 | 2.94 |                     |        |      |      |
| H_w-H3                 | 9.88   | 1.65 | 3.92 |                     |        |      |      |
| H_w-H4                 | 9.88   | 1.65 | 3.92 |                     |        |      |      |
| H_w-H9                 | 15.88  | 1.01 | 4.11 |                     |        |      |      |
| H_w-O2                 | 148.32 | 1.57 | 2.7  |                     |        |      |      |
| H_w-O3                 | 5.82   | 1.26 | 3.21 |                     |        |      |      |
| H_w-Zn2                | 110.98 | 1.43 | 3.32 |                     |        |      |      |
| O_w-C1                 | 50.32  | 1.64 | 3.71 |                     |        |      |      |
| O_w-C2                 | 100.32 | 1.84 | 3.41 |                     |        |      |      |
| O_w-C3                 | 240.32 | 1.24 | 3.21 |                     |        |      |      |
| O_w-C4                 | 240.32 | 1.24 | 3.21 |                     |        |      |      |
| O_w-C5                 | 180.32 | 1.24 | 3.71 |                     |        |      |      |
| O_w-C8                 | 73.42  | 1.22 | 3.32 |                     |        |      |      |
| O_w-C9                 | 65.61  | 1.41 | 3.63 |                     |        |      |      |
| O_w-H3                 | 40.07  | 1.65 | 3.52 |                     |        |      |      |
| O_w-H4                 | 40.07  | 1.65 | 3.52 |                     |        |      |      |
| O_w-H9                 | 50.21  | 1.15 | 3.21 |                     |        |      |      |
| O_w-O2                 | 158.87 | 1.43 | 3.58 |                     |        |      |      |
| O_w-O3                 | 110.85 | 2.02 | 3.22 |                     |        |      |      |
| O_w-Zn2                | 92.26  | 2.23 | 2.89 |                     |        |      |      |
| O_w-H_w <sup>b</sup>   | 25.55  | 1.87 | 2.76 |                     |        |      |      |
| O_w-O_w <sup>b</sup>   | 146.17 | 1.73 | 2.96 |                     |        |      |      |
| H_w-H_w <sup>b</sup>   | 59.87  | 1.31 | 3.31 |                     |        |      |      |
| N_no-H_w <sup>b</sup>  | 47.68  | 1.91 | 2.74 |                     |        |      |      |
| O_no-H_w <sup>b</sup>  | 60.29  | 1.85 | 2.76 |                     |        |      |      |
| O_no-O_w <sup>b</sup>  | 62.08  | 1.56 | 4.11 |                     |        |      |      |
| N_no-O_w <sup>b</sup>  | 74.08  | 1.48 | 3.54 |                     |        |      |      |

a. Force field parameters for H\_h2-H\_h2 were taken from the study of Ghosh et. al (1)

b. All of the first-principles calculations for dimer molecules were carried out using CCSD(T)/ aug-cc-pVQZ method.

1.Ghosh S, Singh JK. Int J Hydrog Energy. 2019;44(3).

**Table S3** Comparison of diffusion coefficients of NO and CO in (Zn)MOF-470 and Ag-(Zn)MOF-470 computed from short (1000 ps) and long (2500 ps) simulation runs in the fixed mode of Ag atoms ( $D$  in  $10^{-9} \text{ m}^2\text{s}^{-1}$ ) and related  $\beta$  values at 310K and 1 bar.

| MD time   | NO      |      | Ag-fix-NO |      | CO      |      | Ag-fixed-CO |      |
|-----------|---------|------|-----------|------|---------|------|-------------|------|
|           | $\beta$ | D    | $\beta$   | D    | $\beta$ | D    | $\beta$     | D    |
| Short-run | 0.99    | 6.90 | 1.00      | 1.81 | 0.98    | 9.49 | .0.96       | 2.17 |
| Long-run  | 0.93    | 6.90 | 0.91      | 1.75 | 0.94    | 9.51 | 0.98        | 2.15 |

**Table S4** The binding energies from first-principles calculations and Morse potential fitting for Ag, H<sub>2</sub>, NO, Co, and H<sub>2</sub>O with four cluster models( Frag-1, 2, 3, and 4 refers to the models of a, b, e, and d of Figure 2).

| E (kcal.mol <sup>-1</sup> ) | First-Principles |        |        |        | Morse Potential |        |        |        |
|-----------------------------|------------------|--------|--------|--------|-----------------|--------|--------|--------|
|                             | Frag-1           | Frag-2 | Frag-3 | Frag-4 | Frag-1          | Frag-2 | Frag-3 | Frag-4 |
| Ag                          | -3.61            | -4.03  | -      | -5.62  | -3.95           | -4.26  | -      | -5.34  |
| H2                          | -0.701           | -0.853 | -0.923 | -2.00  | -0.713          | -0.850 | -0.928 | -2.06  |
| NO                          | -1.71            | -1.26  | -0.47  | -4.96  | -1.66           | -1.03  | -0.42  | -4.93  |
| CO                          | -1.01            | -1.35  | -1.56  | -3.8   | -1.06           | -1.39  | -1.27  | -3.5   |

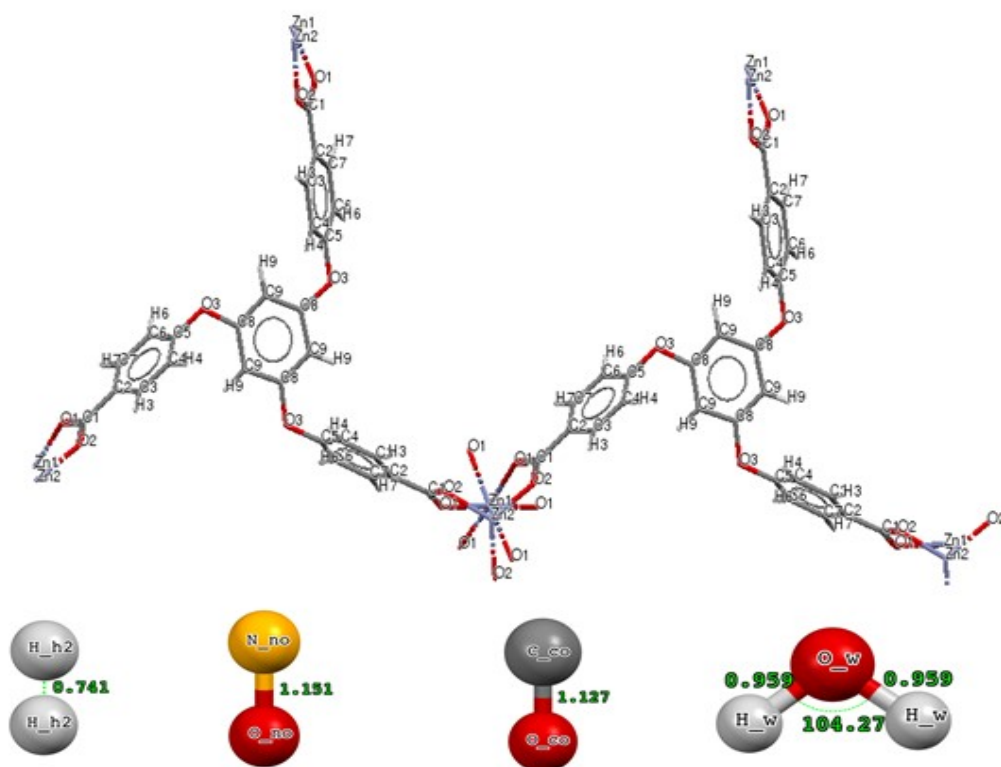

**Figure S1** The structures of H<sub>2</sub>, NO, CO, and H<sub>2</sub>O molecules and (Zn)BTTB with label of atom types used for non-bonded interactions.

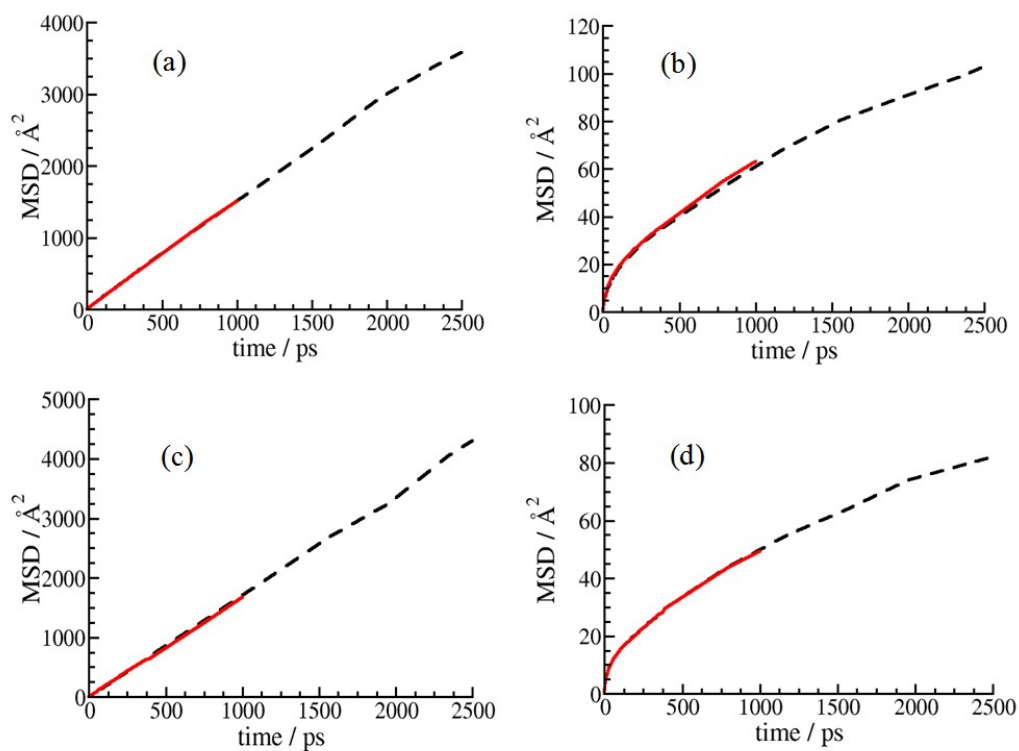

**Figure S2** Comparison of the MSD of NO (a,b) and CO (c,d) in (Zn)MOF-470 and Ag-(Zn)MOF-470 computed from short (1000 ps) and long (2500 ps) simulation runs. The dashed and the solid lines correspond to the long and short runs, respectively.

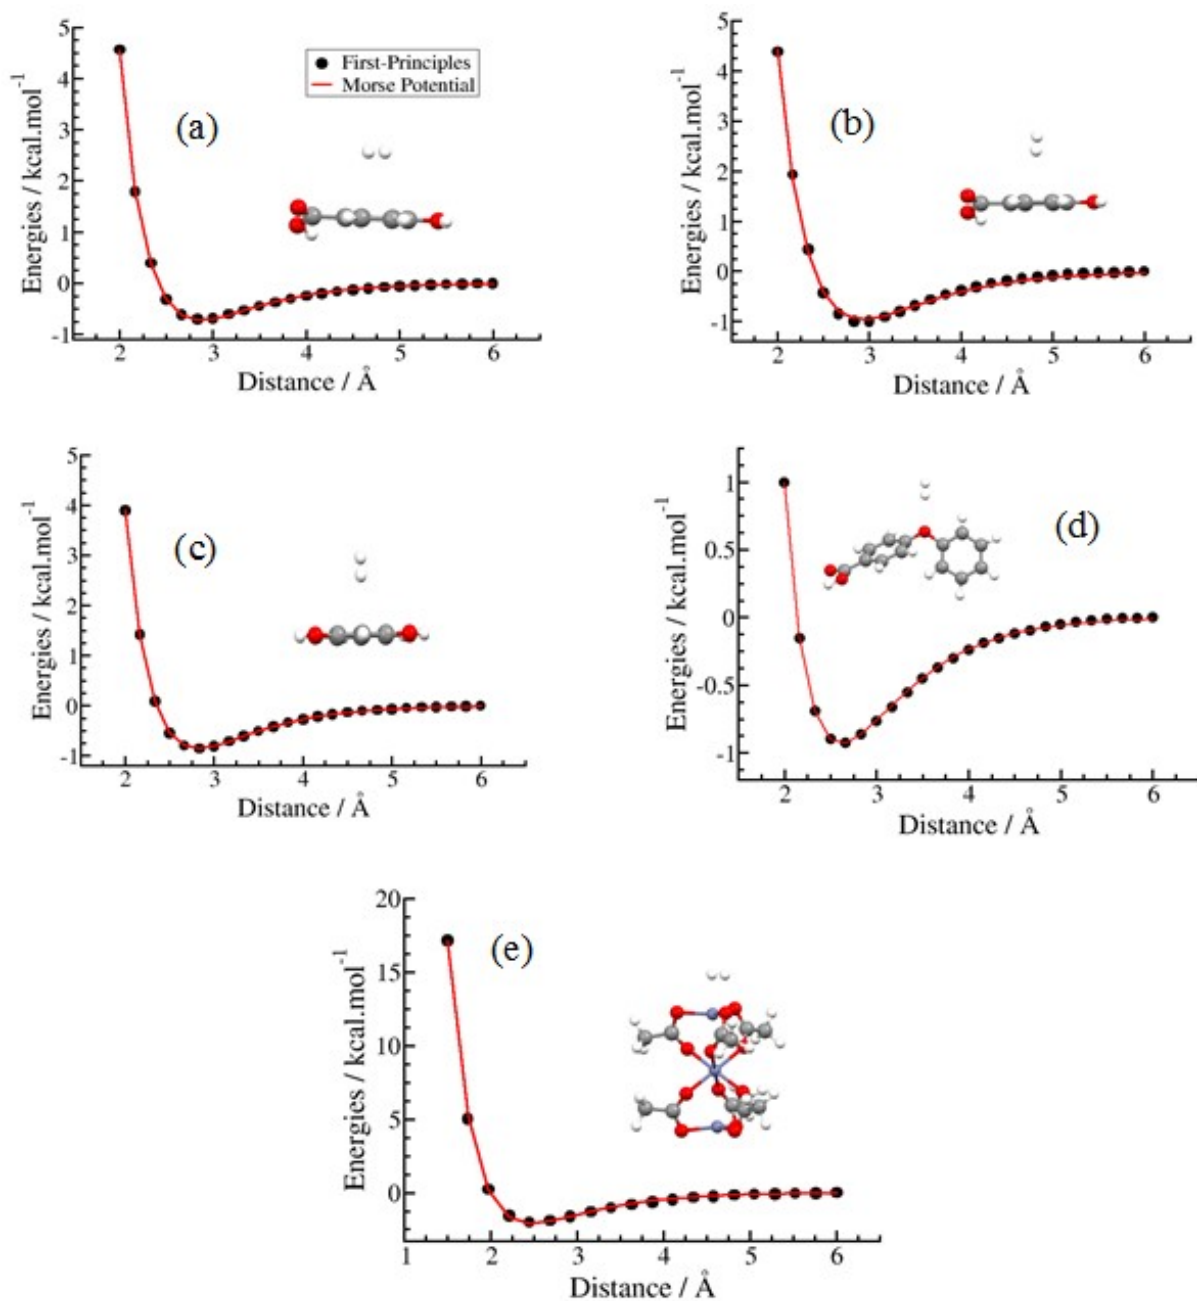

**Figure S3** Potential energies of H<sub>2</sub> with fragments of MOF structure derived from the first-principles calculations and force field fitting: (a) parallel to the plane of frag-1, (b) vertical to the plane of frag-1, (c) vertical to the plane of frag-2, (d) vertical to the plane of frag-3, and (e) parallel to the plane of frag-4.

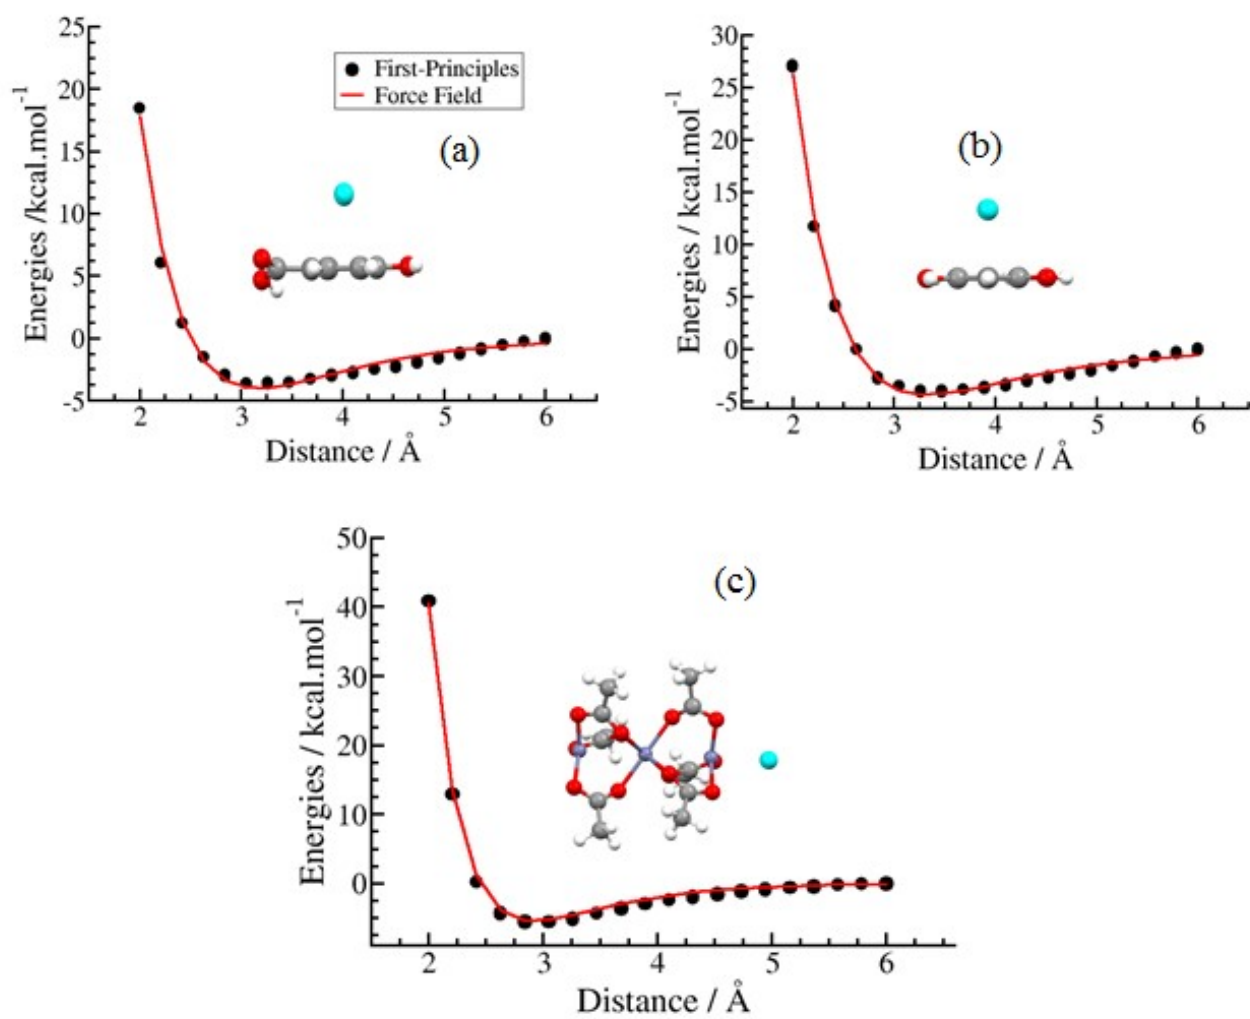

**Figure S4** Potential energies of Ag with fragments of MOF structure derived from the first-principles calculations and force field fitting: (a) frag-1, (b) frag-2 and (c) frag-4.

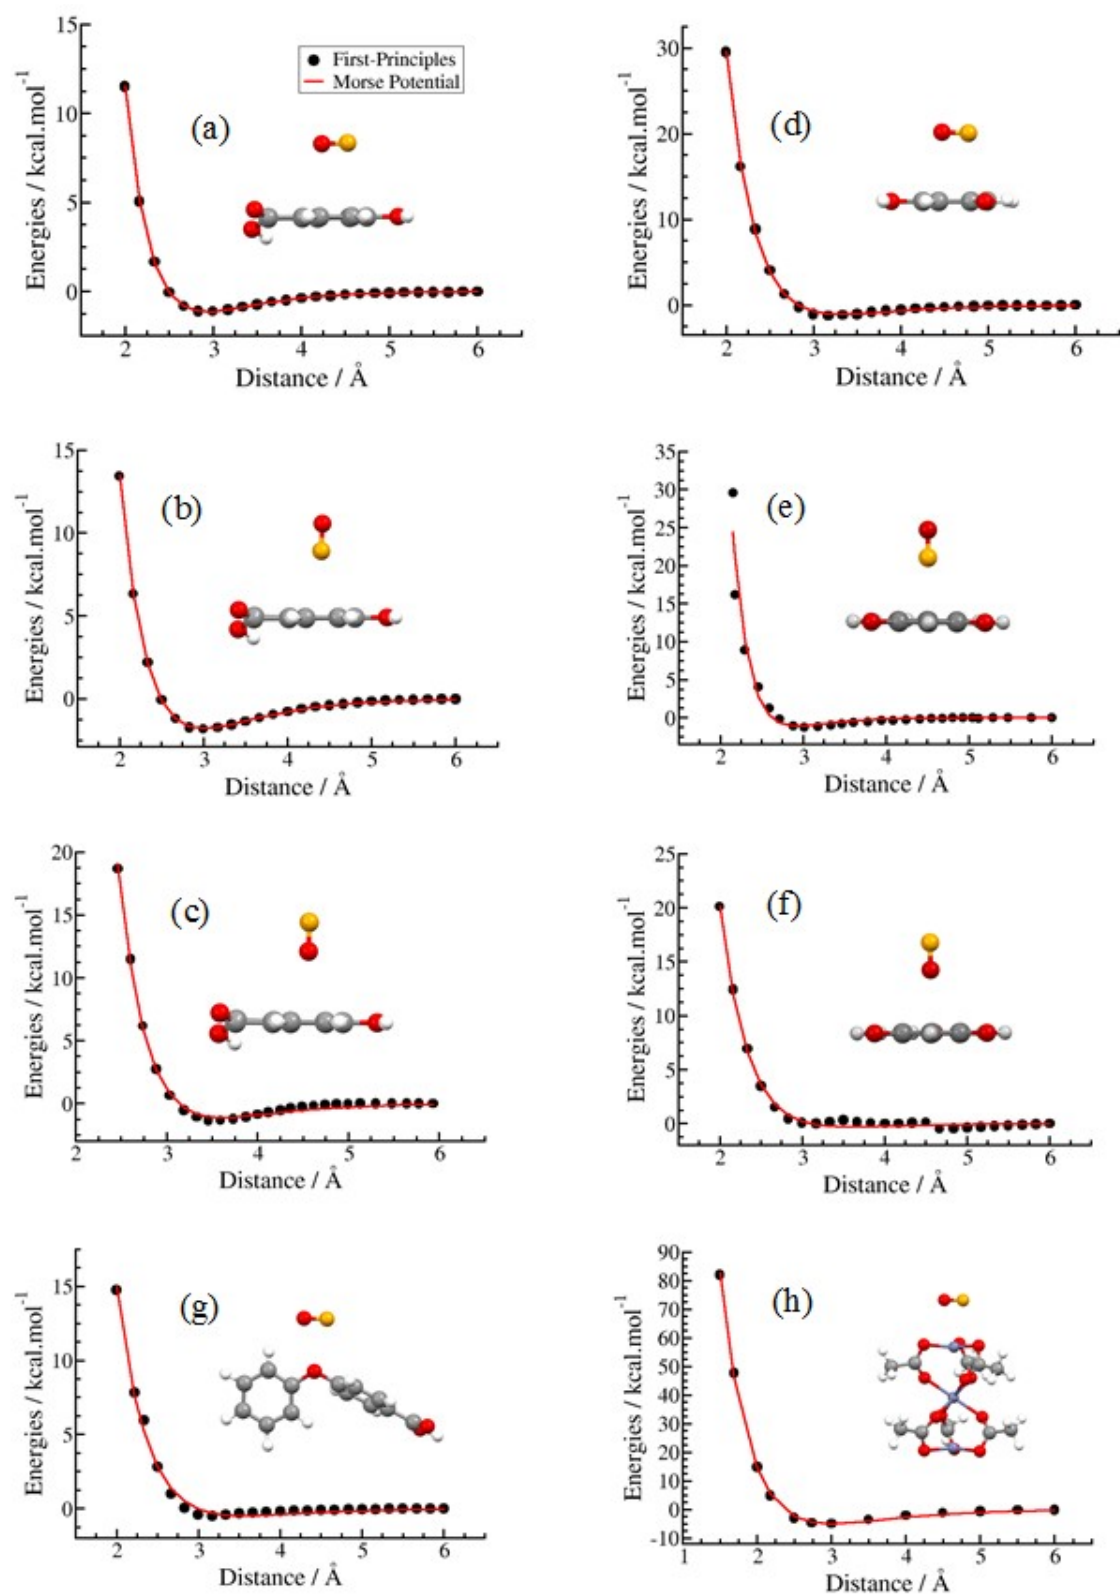

**Figure S5** Potential energies of NO with fragments of MOF structure derived from the first-principles calculations and force field fitting: (a) parallel to the plane of frag-1, (b) vertical N-side to the plane frag-1, (c) vertical O-side to the plane of frag-1, (d) parallel to the plane of frag-2, (e) vertical N-side to the plane frag-2, (f) vertical O-side to the plane of frag-2, (g) parallel to the plane of frag-3, and (h) parallel to the plane of frag-4.



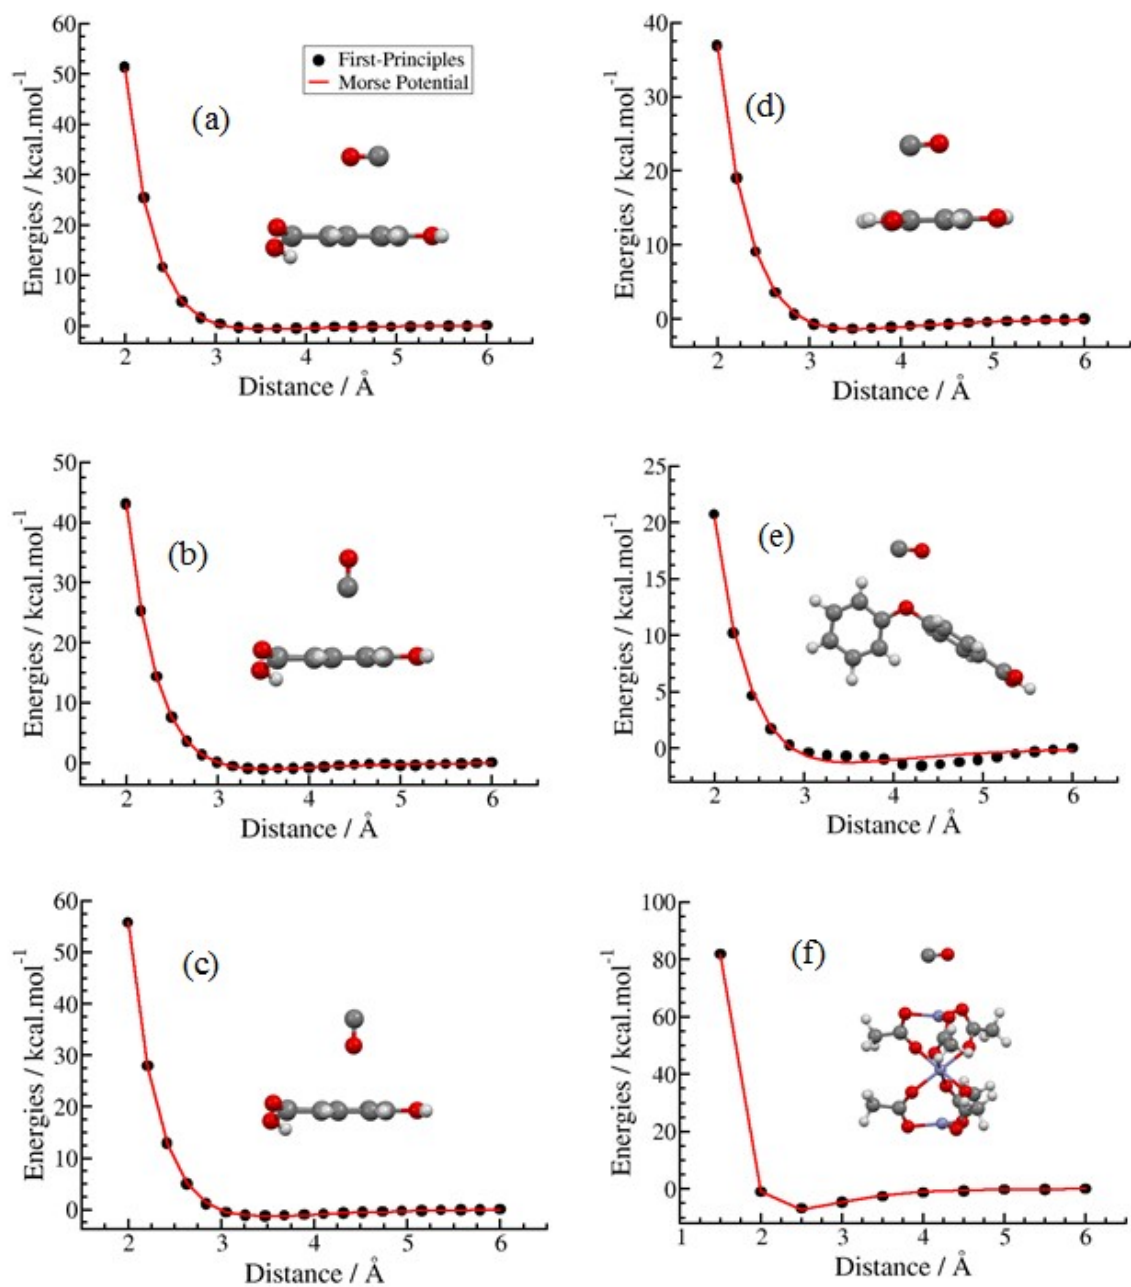

**Figure S6** Potential energies of CO with fragments of MOF structure derived from the first-principles calculations and force field fitting: (a) parallel to the plane of frag-1, (b) vertical C-side to the plane frag-1, (c) vertical O-side to the plane of frag-1, (d) parallel to the plane of frag-2, (e) parallel to the plane of frag-3, and (f) parallel to the plane of frag-4.

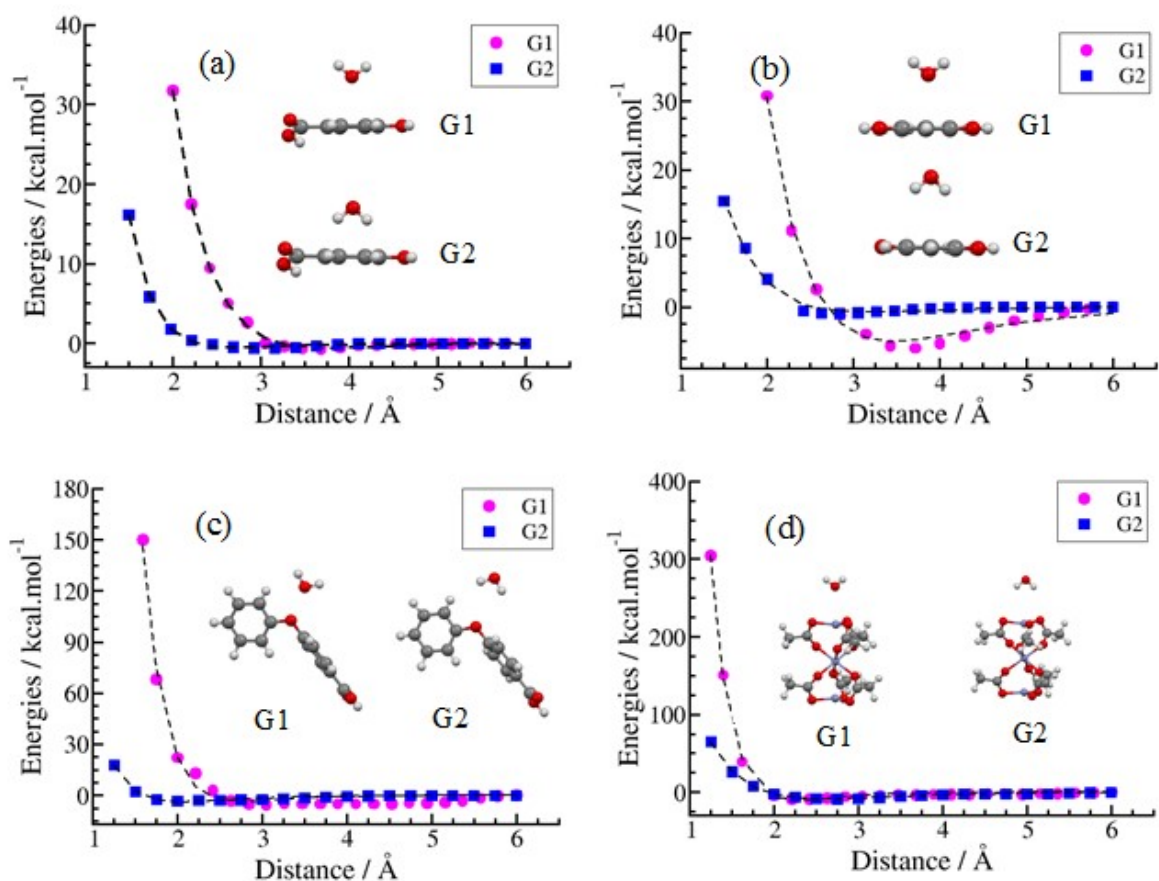

**Figure S7** Potential energies of H<sub>2</sub>O with fragments of MOF structure derived from the first-principles calculations and force field fitting: (a) G1 and G2 configurations of H<sub>2</sub>O with frag-1, (b) G1 and G2 configurations of H<sub>2</sub>O with frag-2, (c) G1 and G2 configurations of H<sub>2</sub>O with frag-3, (d) G1 and G2 configurations of H<sub>2</sub>O with frag-4.

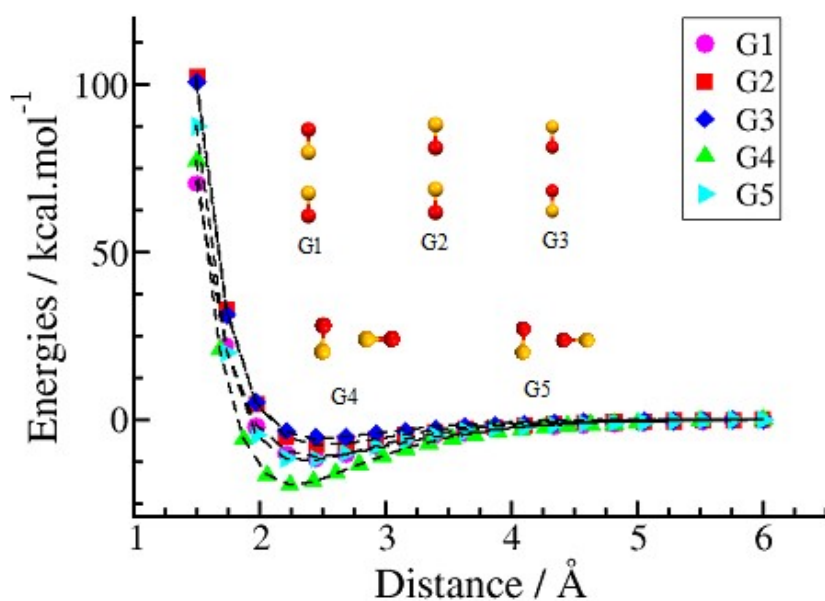

**Figure S8** Potential energies of five possible configurations of NO-NO dimer (G1, G2, G3, G4, and G5) derived from the first-principles calculations and force field fitting.

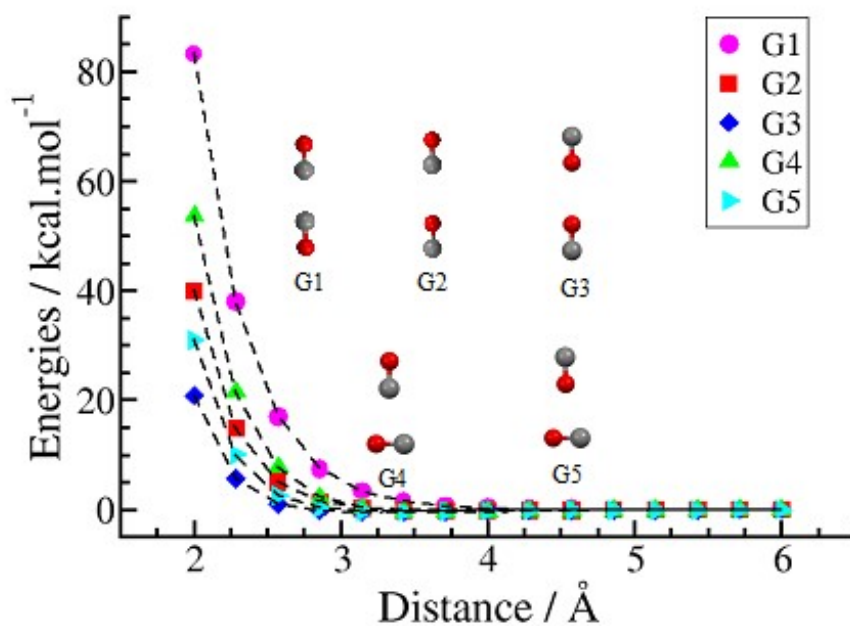

**Figure S9** Potential energies of five possible configurations of CO-CO dimer (G1, G2, G3, G4, and G5) derived from the first-principles calculations and force field fitting.

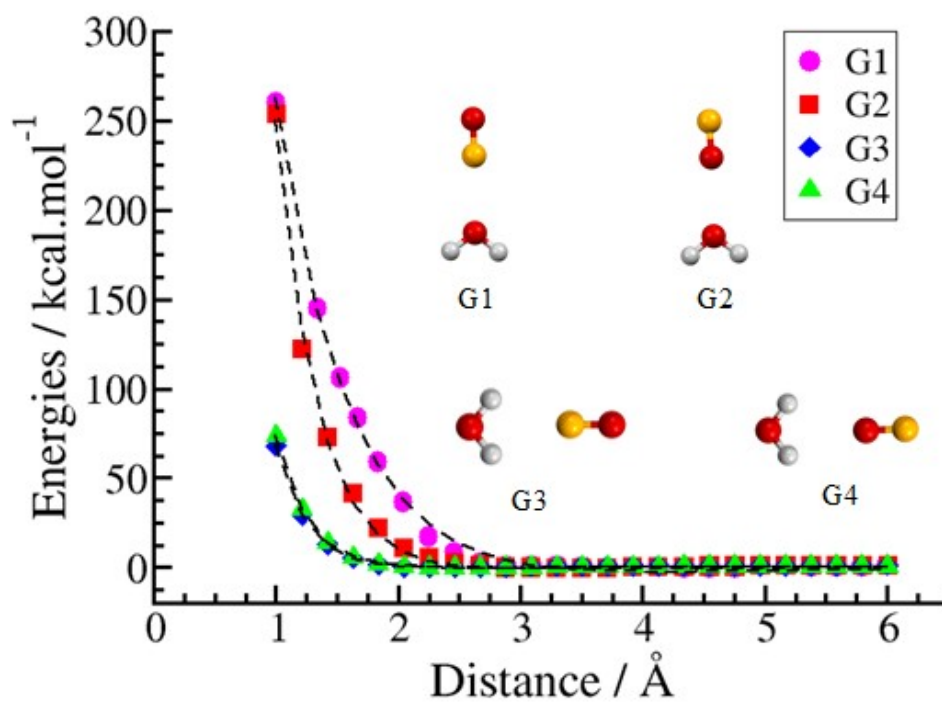

**Figure S10** Potential energies of four possible configurations of NO-H<sub>2</sub>O dimer (G1, G2, G3, and G4) derived from the first-principles calculations and force field fitting.

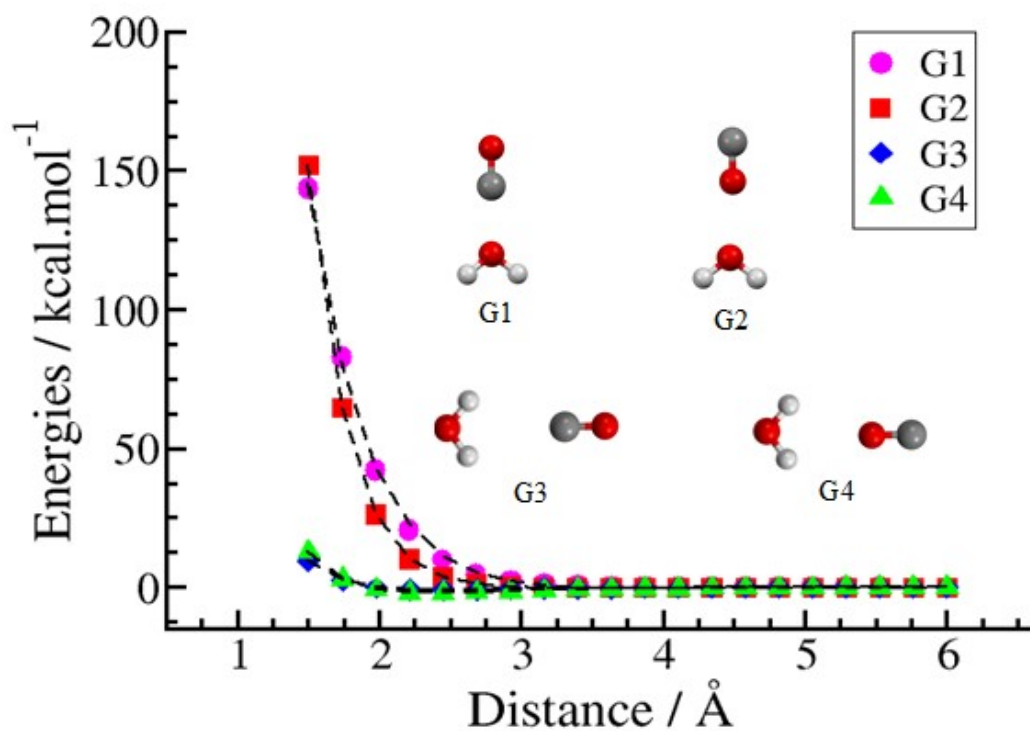

**Figure S11** Potential energies of four possible configurations of CO-H<sub>2</sub>O dimer (G1, G2, G3, and G4) derived from the first-principles calculations and force field fitting.

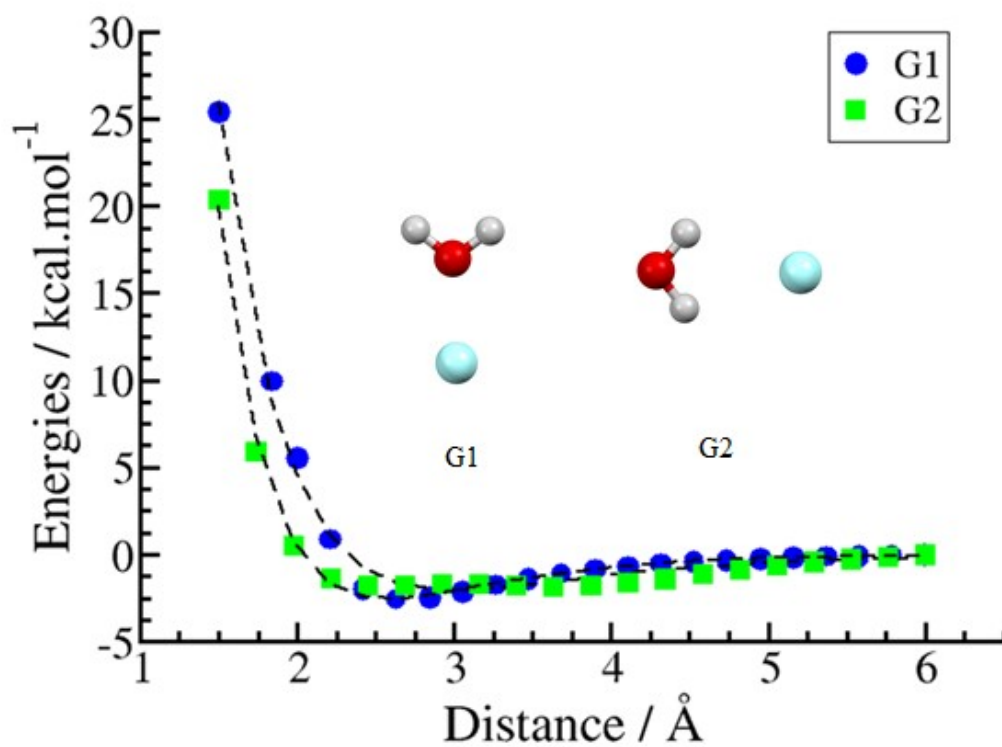

**Figure S12** Potential energies of two configurations of Ag-H<sub>2</sub>O dimer (G1, G2) derived from the first-principles calculations and force field fitting.

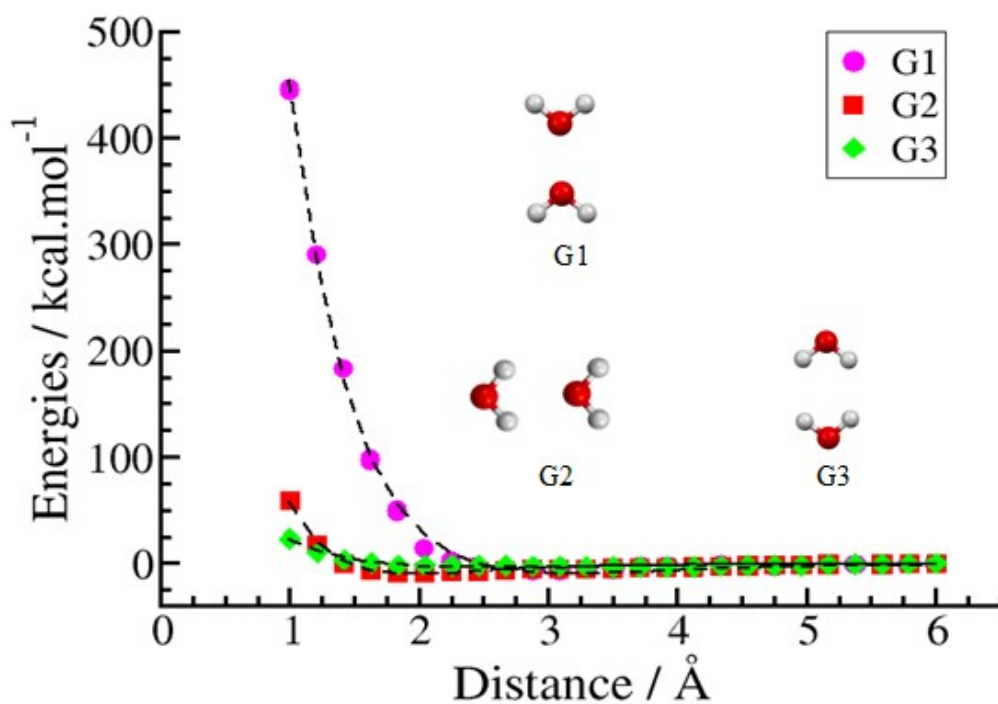

**Figure S13** Potential energies of three configurations of H<sub>2</sub>O-H<sub>2</sub>O dimer (G1, G2, and G3) derived from the first-principles calculations and force field fitting

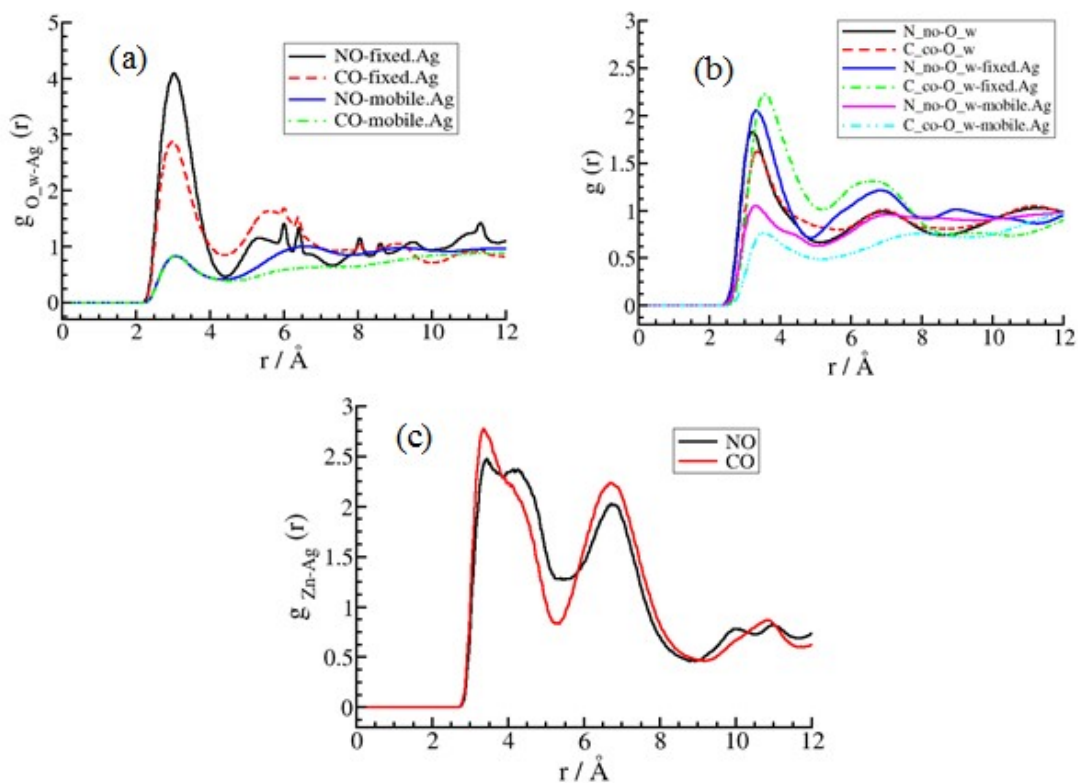

**Figure S14** The RDFs from the simulations between (a) O<sub>w</sub> and Ag atoms in the fixed and mobile modes, (b) N<sub>no</sub> and C<sub>co</sub> with O<sub>w</sub> in (Zn)MOF-470 and Ag-(Zn)MOF-470 structures, and (c) Zn<sub>2</sub> and mobile Ag atoms for NO and CO guest molecules.
